# Supplementary material for: Ancestral reproductive structure in basal kelp Aureophycus aleuticus
Source: PubMed Central journal article supplement — Sci Rep. 2013 Aug 22;3:2491. doi: 10.1038/srep02491 (PMC3749548; doi:10.1038/srep02491), 2013-08-22
Supplement: srep02491-s1.pdf [file srep02491-s1.pdf]

How was the ancient kelp?

– novel reproductive structure in *Aureophycus aleuticus* (Laminiariales) –

Hiroshi Kawai<sup>1</sup> and Takeaki Hanyuda<sup>1</sup>

Kobe University Research Center for Inland Seas, Rokkodai, Kobe 657-8501, Japan

L. Michelle Ridgway<sup>2</sup>

Oceanus, Juneau, AK 99801, U.S.A.

and

Karin Holser<sup>3</sup>

St. George Island Research Institute, St. George Island, AK 99801, U.S.A.

**Supplementary Information 1–9**

**Supplementary Information 1.** Map showing the collections sites of *Aureophycus aleuticus*: Kagamil Island (type locality), and St. George Island, Pribilof Islands (this study). No populations have been found at the surrounding islands of Kagamil Island, and St. Paul Island. (Original drawing by H.K.)

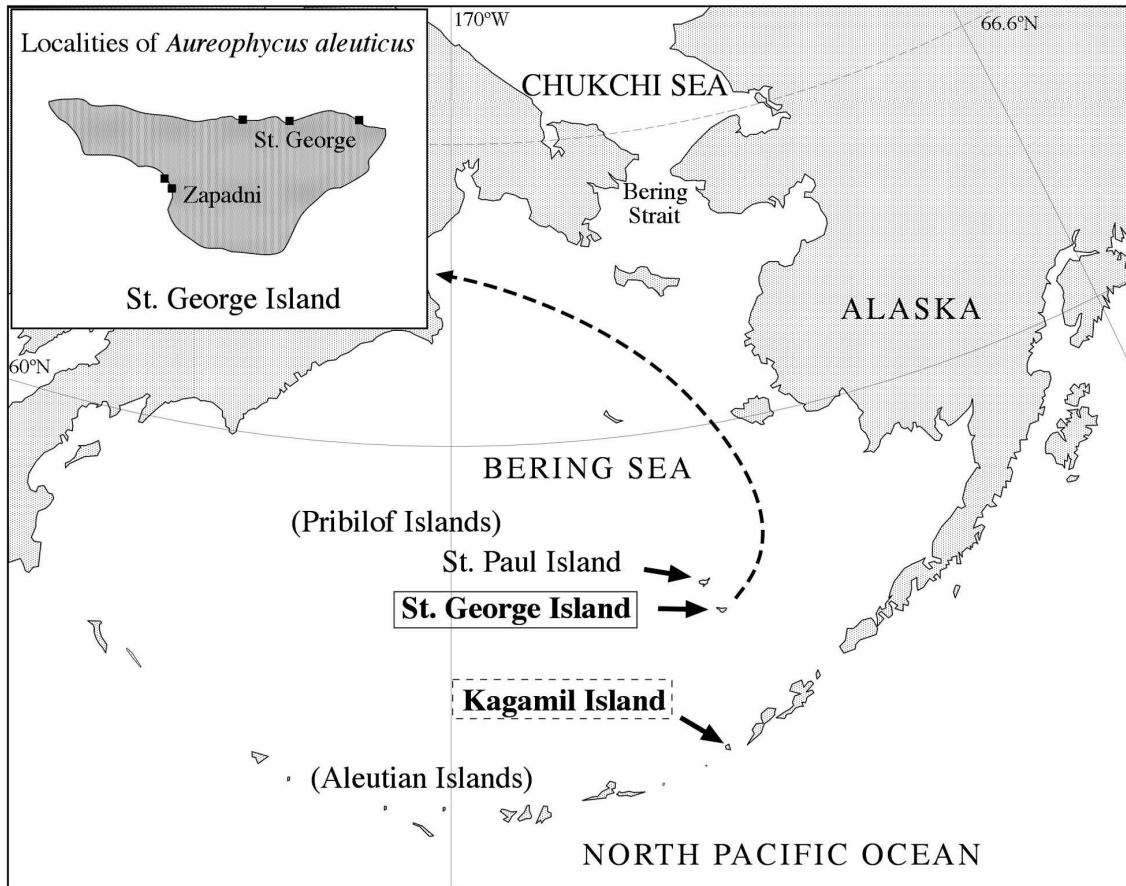

**Supplementary Information 2.** List of primers used for polymerase chain reaction (PCR) and sequencing

| Code       | F/R | Sequence (5'-3')        | Annealing position      | Reference  |
|------------|-----|-------------------------|-------------------------|------------|
| ycf3-F1P   | F   | CAAGCDYTAAATAATATWGCTG  | <i>ycf3</i> (319-340)   | this study |
| atpB-F1P   | F   | GCWAAAGCNCATGGTGGTGT    | <i>atpB</i> (535-554)   | this study |
| atpB-F1.2P | F   | AARGTMGTWGAYYTATTAGC    | <i>atpB</i> (427-446)   | this study |
| atpB-F1.3P | F   | GTHMGHGCNATTGCNATGAGTGC | <i>atpB</i> (187-209)   | this study |
| atpB-F2P   | F   | GCDGTRGAYCCHTTAGATTCA   | <i>atpB</i> (1057-1077) | this study |
| atpB-2R    | R   | AGCTTGWACAAATCTAAAAATA  | <i>atpB</i> (810-789)   | 1          |
| atpB-R2P   | R   | GCWATAATATCTTGTAATTC    | <i>atpB</i> (1184-1165) | this study |
| atpB-R2.2P | R   | TCKACHACTAADCGRCTCTTC   | <i>atpB</i> (1232-1213) | this study |
| atpB-R3P   | R   | CAYRTAYAAATCRTTTCCTTC   | <i>atpB</i> (609-589)   | this study |
| atpB-R4P   | R   | GCWGRKCKATGRATAGGTAA    | <i>atpB</i> (374-355)   | this study |
| atpB-R1P   | R   | TTTGCTTTAGMDATWGCTTC    | <i>atpB</i> (1430-1411) | this study |
| psaA130F   | F   | AACWACWACTTGGATTTGGAA   | <i>psaA</i> (126-146)   | 2          |
| psaA-P2    | R   | NCCWGACCAAGMWARACAAC    | <i>psaA</i> (639-620)   | 3          |
| psaA-P2.2  | R   | TCDGCRTTYTGRAACCAAYTC   | <i>psaA</i> (578-559)   | this study |
| psaA-P3    | R   | GCTGGDTTRTARTCACGAACC   | <i>psaA</i> (1253-1233) | 3          |
| psaA-P3.2  | R   | GCWGGRTTATARTCRCGDACC   | <i>psaA</i> (1253-1233) | this study |
| psaA970R   | R   | GCYTCTARAATYTCTTTCA     | <i>psaA</i> (977-959)   | 2          |
| psaA970R2  | R   | TRCTATGDCCRATNCCCCAA    | <i>psaA</i> (958-939)   | this study |
| psaA1760R  | R   | CCTCTWCCWGGWCCATCRCAWGG | <i>psaA</i> (1736-1714) | 2          |
| psaA1760R2 | R   | CCRTCACAHGGRAAWCGGAA    | <i>psaA</i> (1724-1705) | this study |
| psaA-F3P   | F   | CWGCWGAYTTTATGGTTCAYC   | <i>psaA</i> (1583-1603) | this study |
| psaA-P4    | R   | NGATTCAATHARYTCTTGCC    | <i>psaA</i> (2094-2075) | 3          |
| psaA-P5    | F   | CAYCATATHCATGCNTTYAC    | <i>psaA</i> (1600-1619) | 3          |
| psaA-F1P   | F   | ATGCAATCNGAYRTTTGGGG    | <i>psaA</i> (1834-1853) | this study |
| psaB-F1P   | F   | ATGCAATCNGAYRTTTGGGG    | <i>psaA</i> (21-40)     | this study |
| psaB-F3P   | F   | WGATGCWCAYMGWCCMCCTG    | <i>psaA</i> (915-934)   | this study |
| psaB-F3.2P | F   | GSTATHGNCAYAAAYATGAAAGA | <i>psaA</i> (886-908)   | this study |
| psaB-R2P   | R   | KAWTGCATACATATGYTGAG    | <i>psaA</i> (1065-1046) | this study |
| psaB-R3P   | R   | CAATGCCAATARA AHGTAACCC | <i>psaA</i> (1787-1766) | this study |
| psaB-R3.2P | R   | CAATARA AHGTAACCCAWCC   | <i>psaA</i> (1781-1762) | this study |
| psaB-R1P   | R   | TTCCAGCHGTTGAWGCWATA    | <i>psaB</i> (2194-2175) | this study |
| psaB-F4P   | F   | CCWTATGCHTTYATGGCAAAGAT | <i>psaB</i> (1069-1092) | this study |
| psbA-F     | F   | ATGACTGCTACTTTAGAAAGACG | <i>psbA</i> (1-23)      | 2          |

|           |   |                         |                         |            |
|-----------|---|-------------------------|-------------------------|------------|
| psbA-F1P  | F | ACCGTTTATACATYGGTTGG    | <i>psbA</i> (77-96)     | this study |
| psbA500F  | F | CTCTGATGGWATGCCWYTAGG   | <i>psbA</i> (504-524)   | 2          |
| psbA600R  | R | CCAAATACACCAGCAACACC    | <i>psbA</i> (620-601)   | 2          |
| psbA600R2 | R | AWACACCAGCAACACCAGCC    | <i>psbA</i> (616-597)   | this study |
| psbA-R1P  | R | TACGYTCRTGCATTACTIONTCC | <i>psbA</i> (1003-984)  | this study |
| psbA-R1   | R | GCTAAATCTARWGGGAAGTTGTG | <i>psbA</i> (1031-1009) | 2          |
| psbC-P1.2 | F | CCACGTGGAAACGCYCTTTA    | <i>psbC</i> (33-52)     | this study |
| psbC-P1   | F | TAGCTCATGCAGGYWTAATGG   | <i>psbC</i> (152-172)   | this study |
| psbC-P3   | R | CTTGCCAAGGTTGRATATCATT  | <i>psbC</i> (1168-1147) | this study |
| psbC-P3.2 | R | ATWCCTTTTTTCRAARCCAGC   | <i>psbC</i> (1379-1360) | this study |
| psbC-P4   | F | GCGTGAYAAAAAYAAAATGAC   | <i>psbC</i> (444-464)   | this study |
| psbC-P5   | R | AARAATGGRAAWGAYTCTTC    | <i>psbC</i> (431-412)   | this study |
| psbC-P6   | F | GAAGCWTCTCAAKCDCARGC    | <i>psbC</i> (925-944)   | this study |
| rbcL-P2   | F | GAWCGRACCTCGAWTWAAAAGTG | <i>rbcL</i> (19-40)     | 4          |
| rbc-R2.5  | R | CCTTCATAAACAACACG       | <i>rbcL</i> (587-571)   | 5          |
| Ral-R952  | R | CATACGCATCCATTTACA      | <i>rbcL</i> (969-952)   | 4          |
| rbcL-P5   | F | CWTAYYTAAAAACWTTCCAAG   | <i>rbcL</i> (440-460)   | this study |
| rbcL-P4   | R | AGKTGRTGCATYTGRCCACA    | <i>rbcL</i> (1178-1159) | this study |
| rbcL-Rh3  | F | TTAAYTCTCARCCDTTYATGCG  | <i>rbcL</i> (629-650)   | 6          |
| rbcL-P1   | F | GKGTWATTTGTAARTGGATGCG  | <i>rbcL</i> (944-965)   | 4          |
| rbcL-P3   | F | CARTTYGGWGGWGGTACDATTGG | <i>rbcL</i> (1210-1232) | 5          |
| rbcL-P3.2 | F | GARGGTCCCTGADATTYTACGT  | <i>rbcL</i> (1327-1347) | this study |
| rbcS-P1   | R | GGATCATCTGYCCATTCTACAC  | <i>rbcS</i> (122-101)   | 4          |
| GazF2     | F | CCAACCAYAAAGATATWGGTAC  | <i>cox1</i> (104-125)   | 7          |
| cox1-P1.2 | F | GATHTTYTTTATGGTDATGCC   | <i>cox1</i> (276-296)   | this study |
| cox1-P2   | R | GGDATAACGDCGHGGCATAACC  | <i>cox1</i> (1400-1381) | this study |
| cox1-P3   | R | CNGTAAACATRTGRTGVGCC    | <i>cox1</i> (961-942)   | this study |
| cox1-P4   | F | DGCRGCNTTTACNATGTTTG    | <i>cox1</i> (1230-1249) | this study |
| cox1-P5   | R | TAATACCNCRCGYAAAACWGG   | <i>cox1</i> (700-679)   | this study |
| cox1-P5.2 | R | GCHGTDATTAADACHGACCA    | <i>cox1</i> (656-637)   | this study |
| trnI-P1.2 | R | GCTTATCAGGCGTACACTCT    | <i>trnI</i> (20-39)     | this study |
| trnI-P1   | R | TTGAACGAWCGVCTTTACGC    | <i>trnI</i> (38-57)     | this study |
| trnY-P2   | F | GKCAGATTGTAAATCTGTTGG   | <i>trnY</i> (27-47)     | 3          |
| trnY-P1   | F | TCYATCRTAGGTTCTGAATCC   | <i>trnY</i> (51-70)     | 8          |
| cox3-P5.2 | F | KCHCCHGTYTTTAATATTGG    | <i>cox3</i> (340-359)   | 9          |
| cox3-P6   | R | CDACAATHGCATGATGAGCCC   | <i>cox3</i> (478-458)   | 9          |

|         |   |                      |                       |    |
|---------|---|----------------------|-----------------------|----|
| cox3-P2 | R | ACAAARTGCCAATACCAAGC | <i>cox3</i> (755-736) | 8  |
| 18F-1   | F | AAGGTGAAGTCGTAACAAGG | 18S rDNA (1768-1787)  | 10 |
| 5.8F-1  | F | ACGCAGCGAAATGCGATACG | 5.8S rDNA (47-66)     | 10 |
| 26R-1   | R | GTTAGTTTCTTTTCCTCCGC | 26S rDNA (70-51)      | 10 |

Annealing positions correspond to the sequences of *Ectocarpus siliculosus* (*ycf3*, *atpB*, *psaA*, *psaB*, *psbA*, *psbC*, *rbcL*, and *rbcS*, FP102296: Le Corguille et al. 2009; *cox1*, *trnI*, *trnY*, *cox3*, FP885846: Cock J.M. unpublished), *Scytosiphon lomentaria* (Lyngbye) Link (18S rDNA, 5.8S rDNA and 26S rDNA, D16558: Kawai et al. 1995).

**Supplementary Information 3.** Origin of samples and sequence data used for molecular analyses, including their (DDBJ/Genbank) database accession numbers. Specimen codes KU-d#####, silicagel-dried specimens in Kobe University Research Center for Inland Seas; KU-#####, unialgal culture strains in KU-MACC (Kobe University Macroalgal Culture Collections).

| Species                                                            | Origin                   | Accession code |             |             |             |             |               |             |             |          |
|--------------------------------------------------------------------|--------------------------|----------------|-------------|-------------|-------------|-------------|---------------|-------------|-------------|----------|
|                                                                    |                          | <i>coxI</i>    | <i>cox3</i> | <i>atpB</i> | <i>psaA</i> | <i>psaB</i> | <i>psbA</i>   | <i>psbC</i> | <i>rbcL</i> | ITS+5.8S |
| <b>Aureophyceae</b>                                                |                          |                |             |             |             |             |               |             |             |          |
| <b>fam. nov.</b>                                                   |                          |                |             |             |             |             |               |             |             |          |
| <i>Aureophycus aleuticus</i> Kawai, Hanyuda, Lindeberg & Lindstrom | 5                        | -              | -           | -           | -           | -           | -             | -           | AB355025    | AB355026 |
|                                                                    | Present study (KU-d3198) | AB775218       | AB775233    | AB775250    | AB775266    | AB775282    | AB775298      | AB775314    | -           | -        |
|                                                                    | Present study (KU-d4869) | -              | AB775234    | -           | -           | -           | -             | AB775315    | -           | AB776649 |
|                                                                    | Present study (KU-d4882) | -              | AB775235    | -           | -           | -           | -             | AB775316    | -           | AB776650 |
| <b>Akkesiphycaceae</b>                                             |                          |                |             |             |             |             |               |             |             |          |
| <i>Akkesiphycus lubricum</i> Yamada & Tanaka                       | Present study (KU-470)   | AB775219       | AB775236    | AB775251    | AB775267    | AB775283    | AB775299      | AB775317    | AB775330    | -        |
| <b>Alariaceae</b>                                                  |                          |                |             |             |             |             |               |             |             |          |
| <i>Alaria crassifolia</i> Kjellman                                 | Present study (KU-1165)  | AB775220       | AB775237    | AB775252    | AB775268    | AB775284    | AB775300      | AB775318    | AB775331    | -        |
| <i>Pleurophycus gardneri</i> Setchell & Saunders ex Tilden         | Present study (KU-799)   | AB775221       | AB775238    | AB775253    | AB775269    | AB775285    | AB775301      | AB775319    | AB775332    | -        |
| <i>Pterygophora californica</i> Ruprecht                           | Present study (KU-798)   | AB775222       | AB775239    | AB775254    | AB775270    | AB775286    | AB775302      | AB775320    | AB775333    | -        |
| <i>Undaria pinnatifida</i> (Harvey) Suringar                       | Present study (KU-206)   | AB775223       | AB775240    | AB775255    | AB775271    | AB775287    | AB775303      | -           | AB775334    | -        |
| <i>Undaria pinnatifida</i> (Harvey) Suringar                       | 11                       | -              | -           | -           | -           | -           | -             | FM957120    | -           | -        |
| <b>Chordaceae</b>                                                  |                          |                |             |             |             |             |               |             |             |          |
| <i>Chorda asiatica</i> H. Sasaki & H. Kawai                        | Present study (KU-503)   | AB775224       | AB775241    | AB775256    | AB775272    | AB775288    | AB775304      | AB775321    | AB775335    | -        |
| <b>Costariaceae</b>                                                |                          |                |             |             |             |             |               |             |             |          |
| <i>Agarum fimbriatum</i> Harvey                                    | Present study (KU-150)   | AB775225       | AB775242    | AB775257    | AB775273    | AB775289    | AB775300<br>5 | AB775322    | AB775336    | -        |
| <i>Costaria costata</i> (C.Agardh) D.A. Saunders                   | Present study (KU-679)   | AB775226       | AB775243    | AB775258    | AB775274    | AB775290    | AB775306      | AB775323    | AB775337    | -        |
| <b>Laminariaceae</b>                                               |                          |                |             |             |             |             |               |             |             |          |
| <i>Laminaria digitata</i> (Hudson) J.V. Lamouroux                  | Present study (KU-d4680) | -              | -           | AB775259    | AB775275    | AB775291    | AB775307      | AB775324    | AB775338    | -        |
|                                                                    | 12                       | AJ344328       | AJ344328    | -           | -           | -           | -             | -           | -           | -        |

|                                                                       |                          |          |          |          |          |          |          |          |          |   |
|-----------------------------------------------------------------------|--------------------------|----------|----------|----------|----------|----------|----------|----------|----------|---|
| <i>Macrocystis pyrifera</i> (Linnaeus) C. Agardh                      | Present study (KU-1277)  | AB775227 | AB775244 | AB775260 | AB775276 | AB775292 | AB775308 | AB775325 | AB775339 | - |
| <i>Saccharina japonica</i> (Areschoug) Lane, Mayes, Druehl & Saunders | Present study (KU-508)   | AB775228 | AB775245 | AB775261 | AB775277 | AB775293 | AB775309 | -        | -        | - |
|                                                                       | 11                       | -        | -        | -        | -        | -        | -        | FM957121 | FN667660 | - |
| <b>Lessoniaceae</b>                                                   |                          |          |          |          |          |          |          |          |          |   |
| <i>Ecklonia radiata</i> (C.Agardh) J. Agardh                          | Present study (KU-1134)  | AB775229 | AB775246 | AB775262 | AB775278 | AB775294 | AB775310 | AB775326 | AB775340 | - |
| <i>Lessonia variegata</i> J.Agardh                                    | Present study (KU-1271)  | AB775230 | AB775247 | AB775263 | AB775279 | AB775295 | AB775311 | AB775327 | AB775341 | - |
| <b>Pseudochordaceae</b>                                               |                          |          |          |          |          |          |          |          |          |   |
| <i>Pseudochorda nagaii</i> (Tokida) Inagaki                           | Present study (KU-735)   | AB775231 | AB775248 | AB775264 | AB775280 | AB775296 | AB775312 | AB775328 | AB775342 | - |
| <b>Outgroup</b>                                                       |                          |          |          |          |          |          |          |          |          |   |
| <i>Ectocarpus siliculosus</i> (Dillwyn) Lyngbye                       | 13                       | -        | -        | FP102296 | FP102296 | FP102296 | FP102296 | FP102296 | FP102296 | - |
| <i>Ectocarpus siliculosus</i> (Dillwyn) Lyngbye                       | Cock J. M. (unpublished) | FP885846 | FP885846 | -        | -        | -        | -        | -        | -        | - |
| <i>Stictyosiphon soriferus</i> (Reinke) Rosenvinge                    | Present study (KU-704)   | AB775232 | AB775249 | AB775265 | AB775281 | AB775297 | AB775313 | AB775329 | AB775343 | - |

## References

1. Silberfeld, T. et al. 2010. A multi-locus time-calibrated phylogeny of the brown algae (Heterokonta, Ochrophyta, Phaeophyceae): Investigating the evolutionary nature of the “brown algal crown radiation”. *Mol. Phylogenet. Evol.* **56**, 659–674 (2010).
2. Yoon, H. S., Hackett, J. D. & Bhattacharya, D. A single origin of the peridinin- and fucoxanthin-containing plastids in dinoflagellates through tertiary endosymbiosis. *Proc. Natl. Acad. Sci. U.S.A.* **99**, 11724–11729 (2002).
3. Kawai, H., Kogishi, K., Hanyuda, T. & Kitayama, T. Taxonomic revision of the genus *Cutleria* proposing a new genus *Mutimo* to accommodate *M. cylindricus* (Cutleriaceae, Phaeophyceae). *Phycol. Res.* **60**, 241–248 (2012).
4. Kawai, H., Hanyuda, T., Draisma, S.G.A. & Müller, D.G. Molecular phylogeny of

- Discosporangium mesarthrocarpum* (Phaeophyceae) with a reassessment of the Discosporangiales. *J. Phycol.* **43**, 186–94 (2007).
5. Kawai, H., Hanyuda, T., Lindeberg, M. & Lindstrom, S. C. Morphology and molecular phylogeny of *Aureophycus aleuticus* gen. et sp. nov. (Laminariales, Phaeophyceae) from the Aleutian Islands. *J. Phycol.* **44**, 1013–1021 (2008).
  6. Hanyuda, T. et al. Biogeography and taxonomy of *Batrachospermum helminthosum* Bory (Batrachospermales, Rhodophyta) in Japan inferred from *rbcL* gene sequences. *J. Phycol.* **40**, 581–588 (2004).
  7. Lane, C. E., Lindstrom, S. C. & Saunders, G. W. A molecular assessment of northeast Pacific Alaria species (Laminariales, Phaeophyceae) with reference to the utility of DNA barcoding. *Mol. Phylogenet. Evol.* **44**, 634–648 (2007).
  8. Ni-Ni-Win, Hanyuda, T., Arai, S., Uchimura, M., Abbott, I. A. & Kawai, H. New records of *Padina* species from the western coast of the Pacific Ocean. *Phycol. Res.* **56**, 288–300 (2008).
  9. Kogishi, K., Kitayama, T., Miller, K. A., Hanyuda, T. & Kawai, H. Phylogeography of *Cutleria cylindrical* (Cutleriales, Phaeophyceae) in northeastern Asia, and the identity of an introduced population in California. *J. Phycol.* **46**, 553–558 (2010).
  10. Kawai, H., Sasaki, H., Maeda, Y. & Arai, S. Morphology, life history, and molecular phylogeny of *Chorda rigida*, sp. nov. (Laminariales, Phaeophyceae) from the Sea of Japan and the genetic diversity of *Chorda filum*. *J. Phycol.* **37**, 130–142 (2001).
  11. Draisma, S. G. A., Prud'homme van Reine W. F. & Kawai, H. A revised classification of the Sphacelariales (Phaeophyceae) inferred from a *psbC* and *rbcL* based phylogeny. *Eur. J. Phycol.* **45**, 308–326 (2010).
  12. Oudot-Le Secq, M.-P., Kloareg, B. & Loiseaux-De Goër, S. The mitochondrial genome of the brown alga *Laminaria digitata*: a comparative analysis. *Eur. J. Phycol.* **37**, 163–172 (2002).
  13. Le Corguillé, G. et al. Plastid genomes of two brown algae, *Ectocarpus siliculosus* and *Fucus*



*vesiculosus*: further insights on the evolution of red-algal derived plastids. *BMC Evol. Biol.* **9**, 253–266 (2009).

#### 4a MP phylogenetic trees

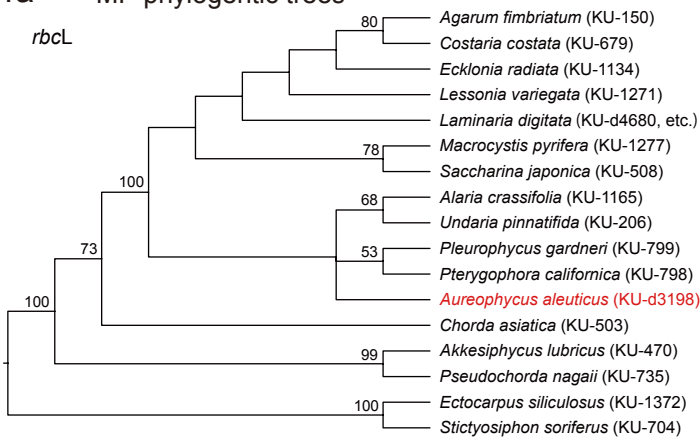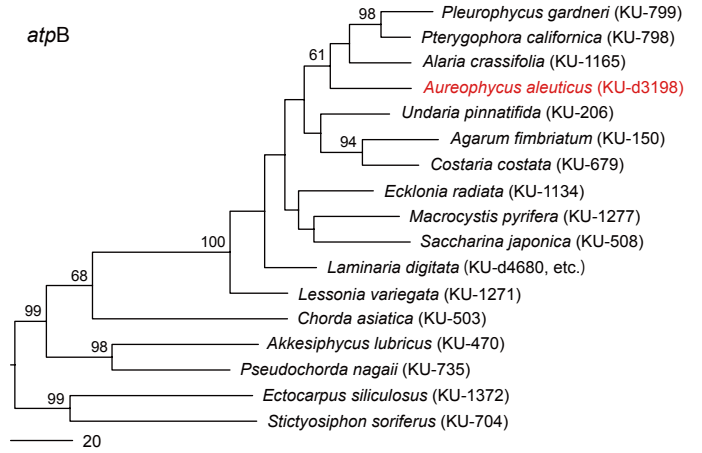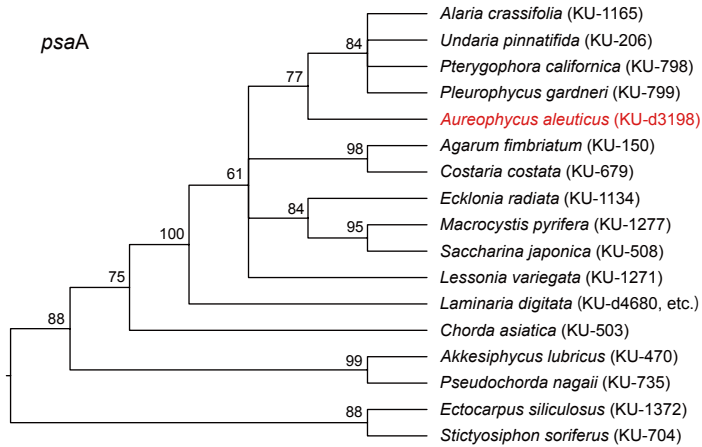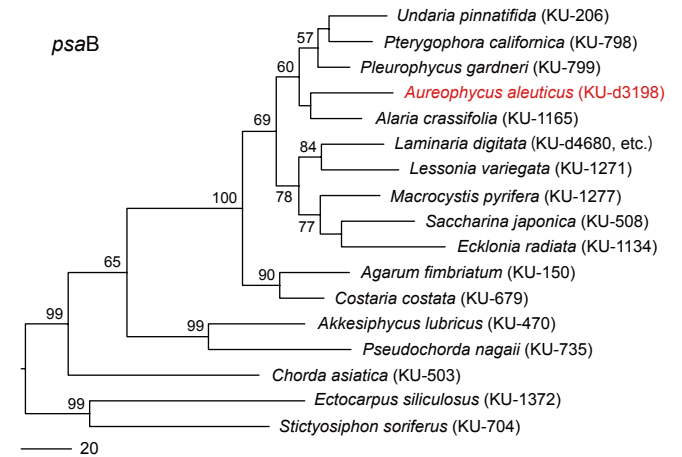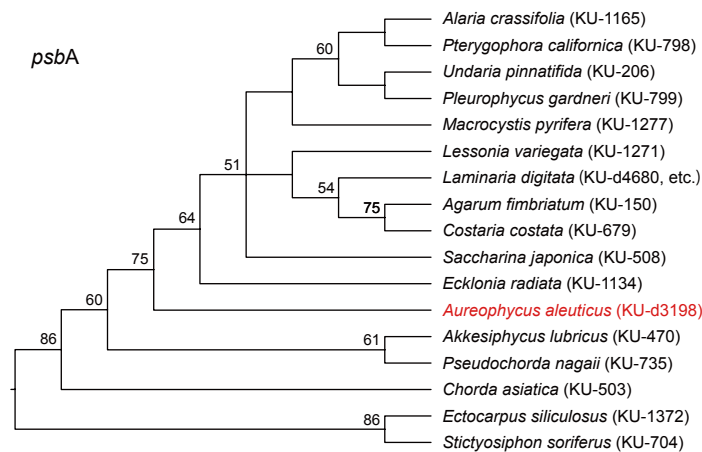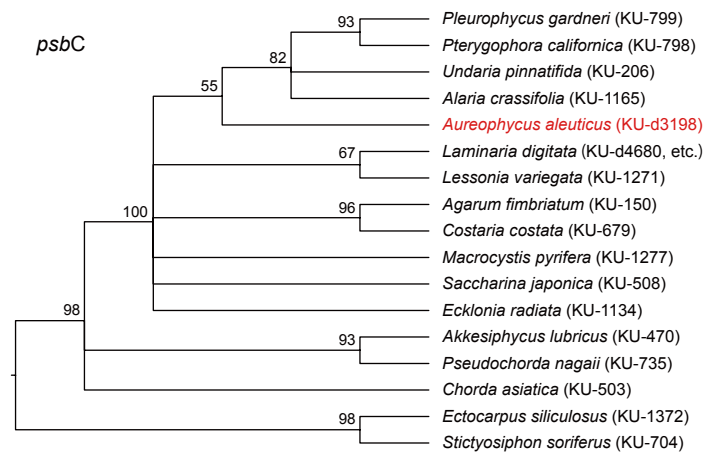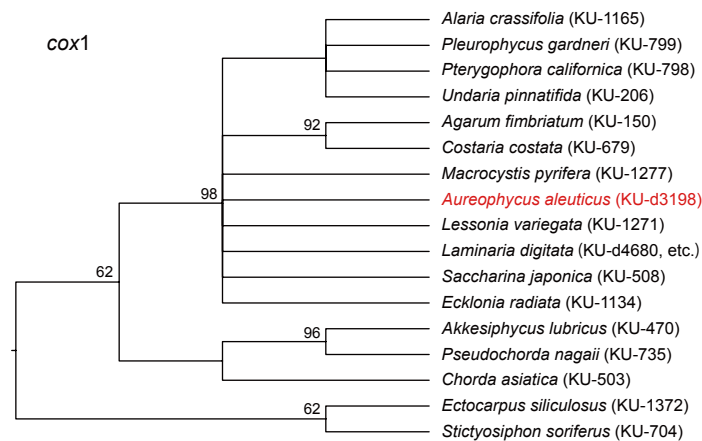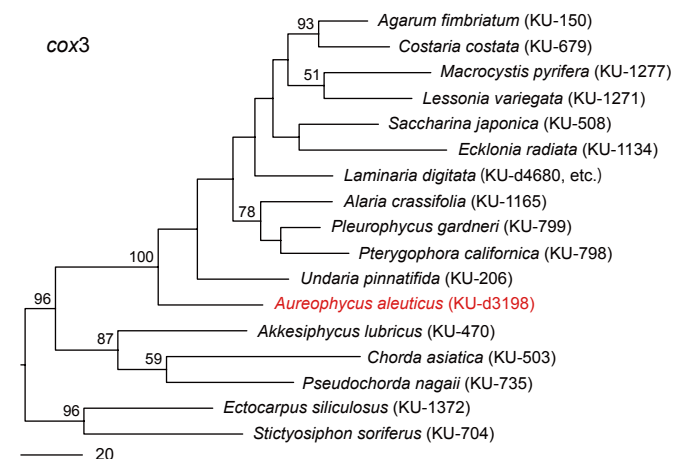

## 4b ML phylogenetic trees

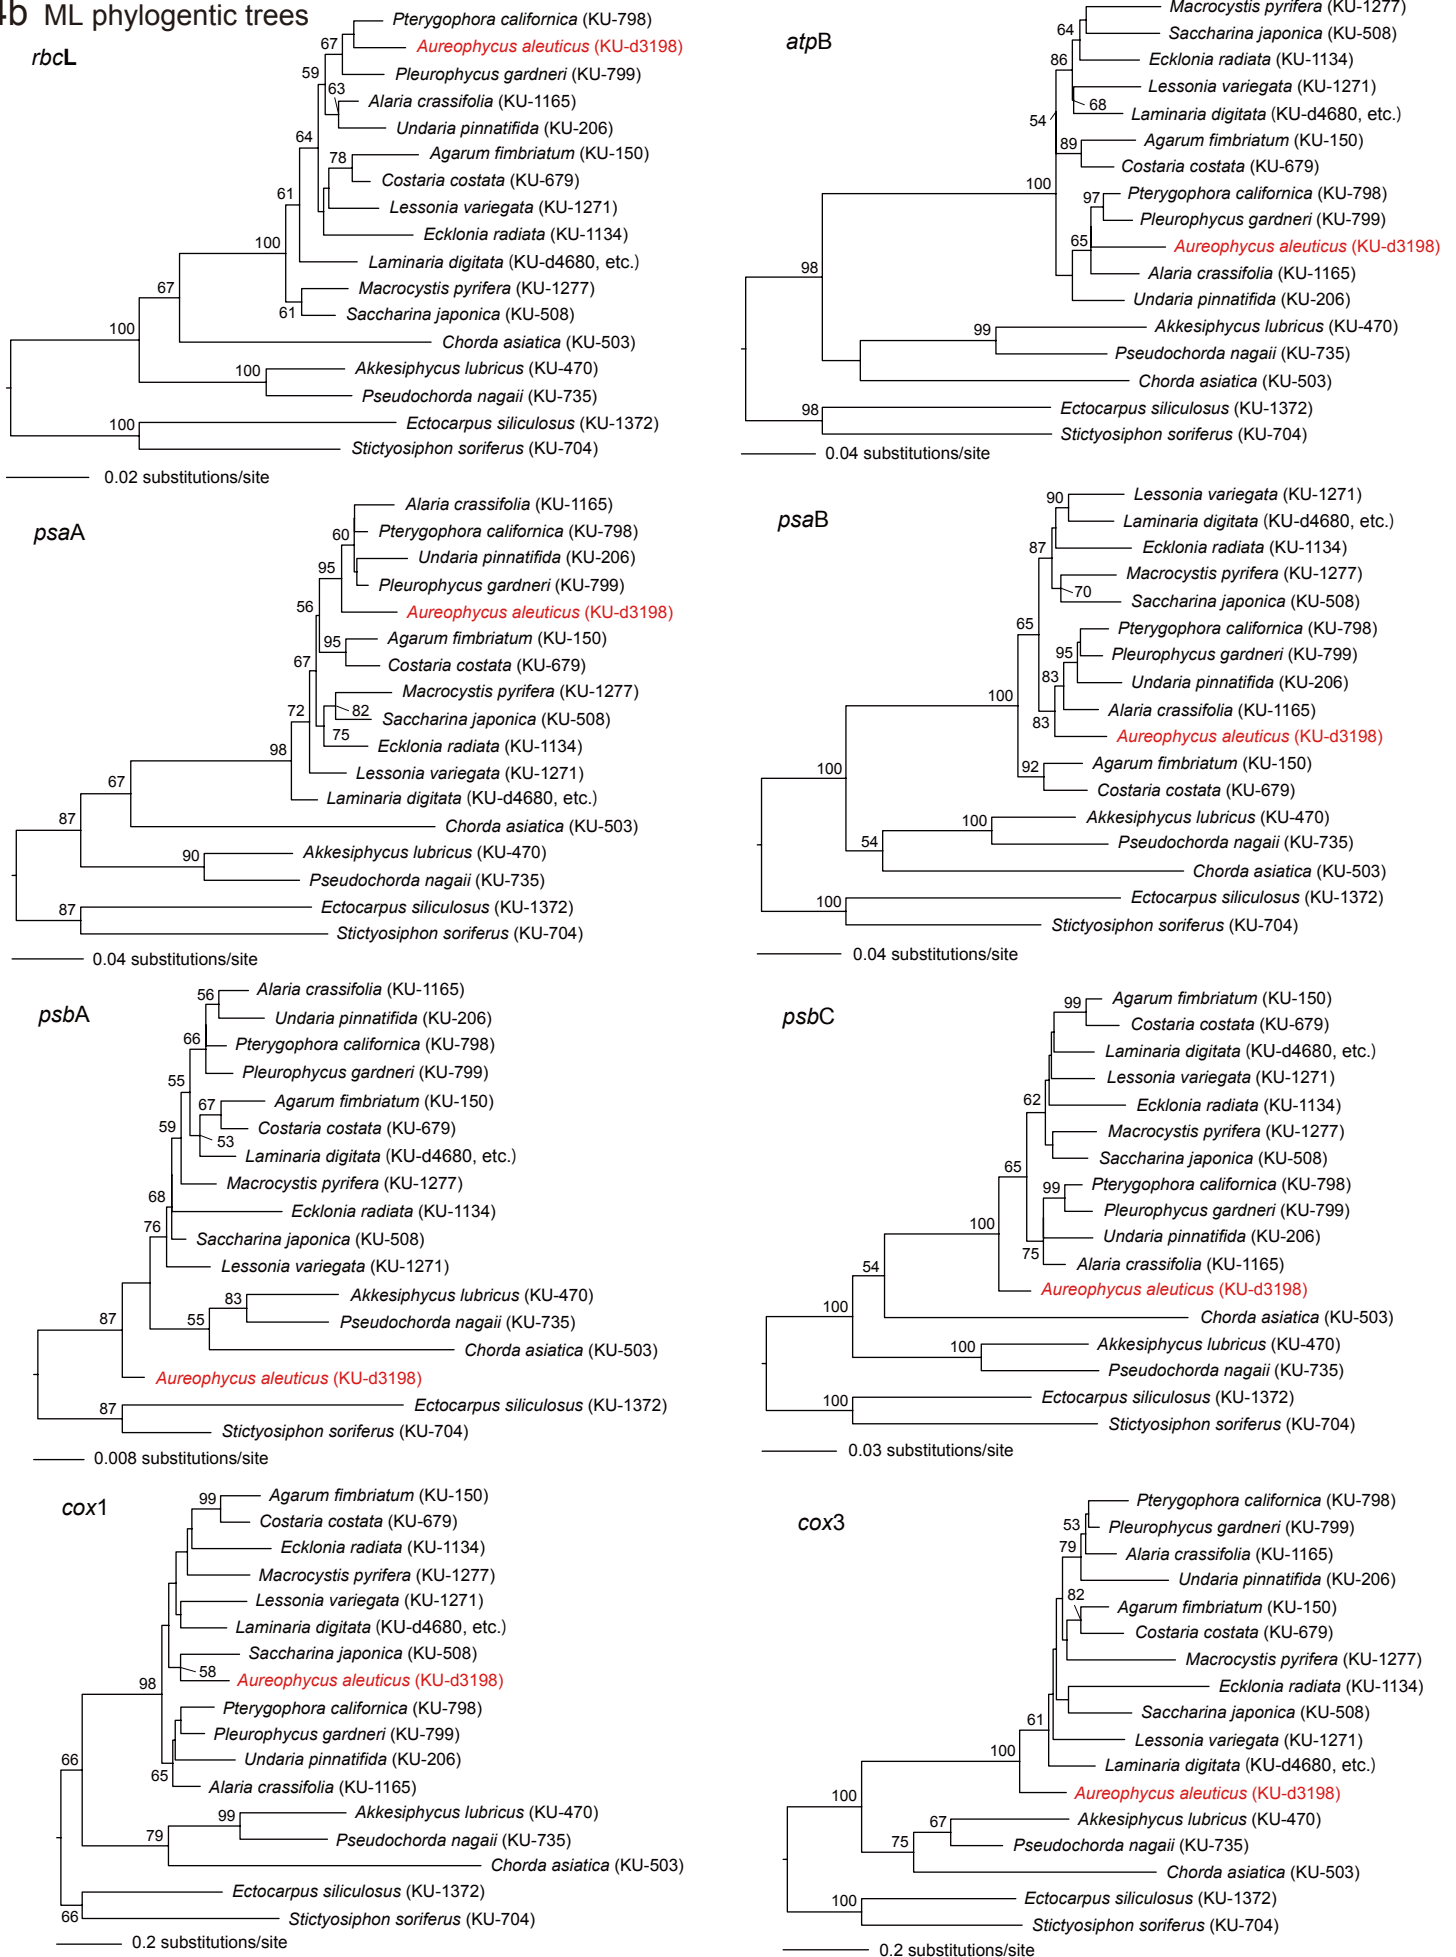

**Supplementary Information 4.** a, Molecular phylogenetic trees based on 8 genes sequences (chloroplast *rbcL*, *atpB*, *psaA*, *psaB*, *psbA*, *psbC* and mitochondrial *cox1* and *cox3* genes) in MP analyses. b, Molecular phylogenetic trees based on 8 independent genes sequences (chloroplast *rbcL*, *atpB*, *psaA*, *psaB*, *psbA*, *psbC* and mitochondrial *cox1* and *cox3* genes) in ML analyses. Bootstrap values > 50% are shown on each node.

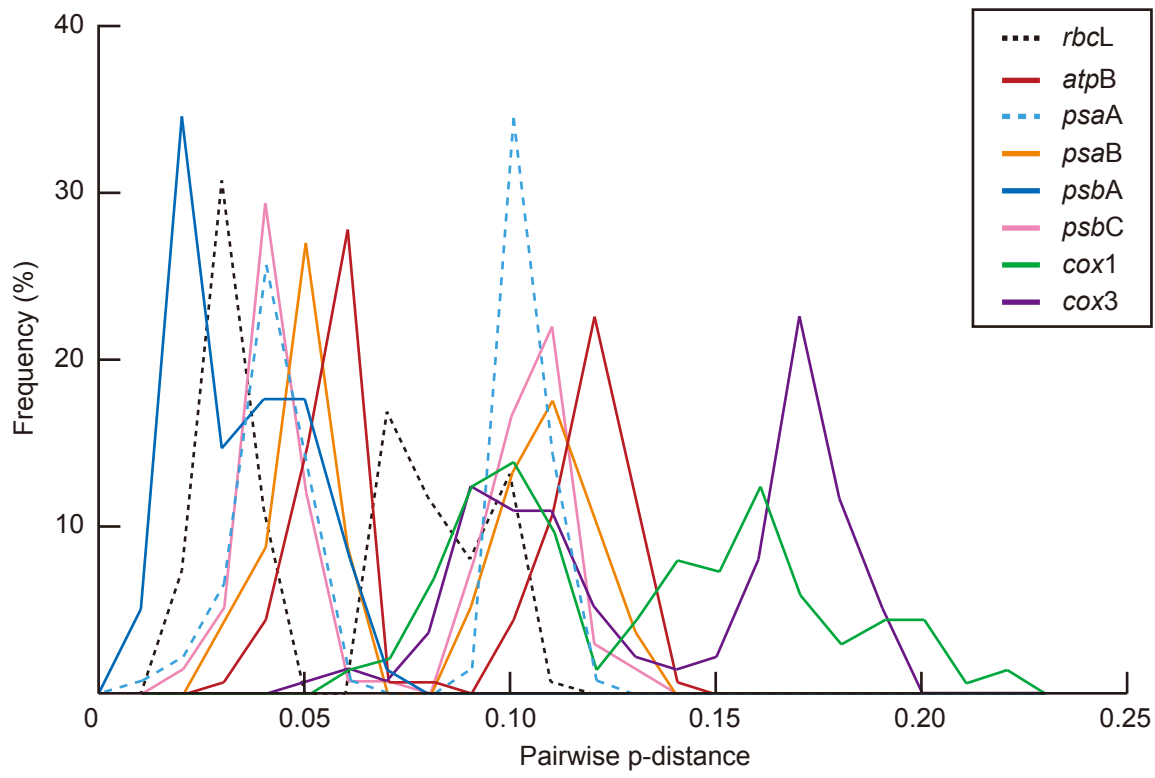

**Supplementary Information 5.** Comparisons of frequency of uncorrected p-distance for eight independent genes (*rbcL*, *atpB*, *psaA*, *psaB*, *psbA*, *psbC*, *cox1* and *cox3*).

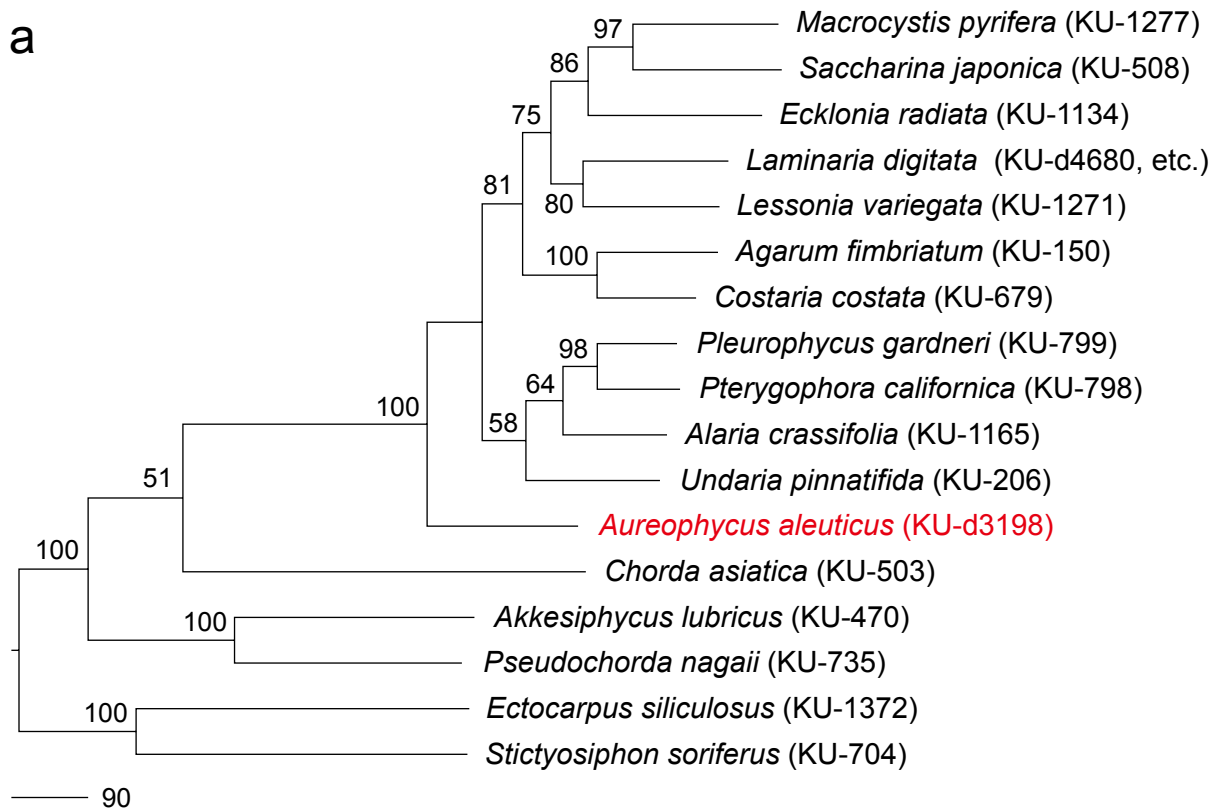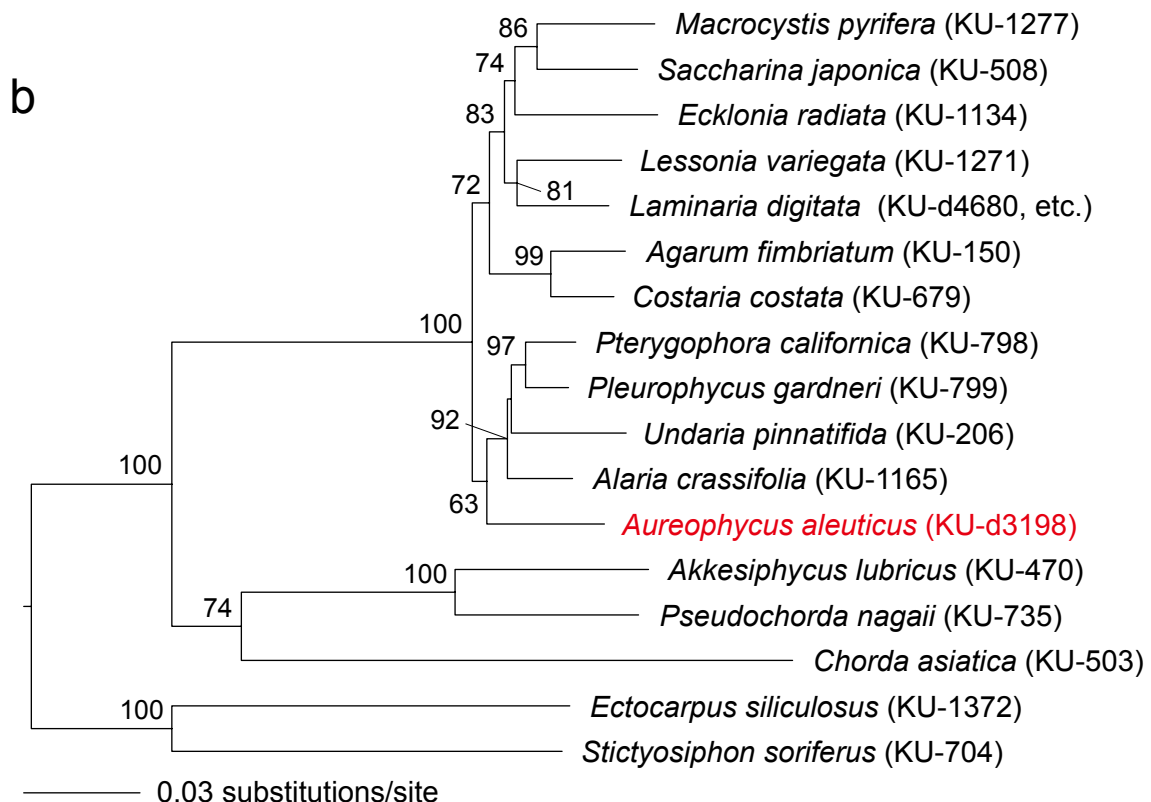

**Supplementary Information 6a, b.** Molecular phylogeny of representative laminarialean species including *Aureophycus aleuticus* based on the concatenated DNA sequences of chloroplast *rbcL*, *atpB*, *psaA*, *psaB*, *psbC* and mitochondrial *cox1* and *cox3* genes. a, Maximum Parsimony (MP) tree. Only bootstrap values > 50% are shown. b, Maximum Likelihood (ML) trees without constraint.

7a

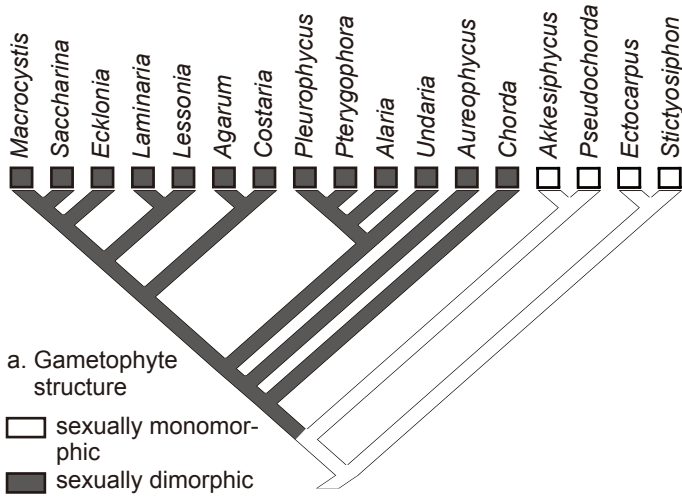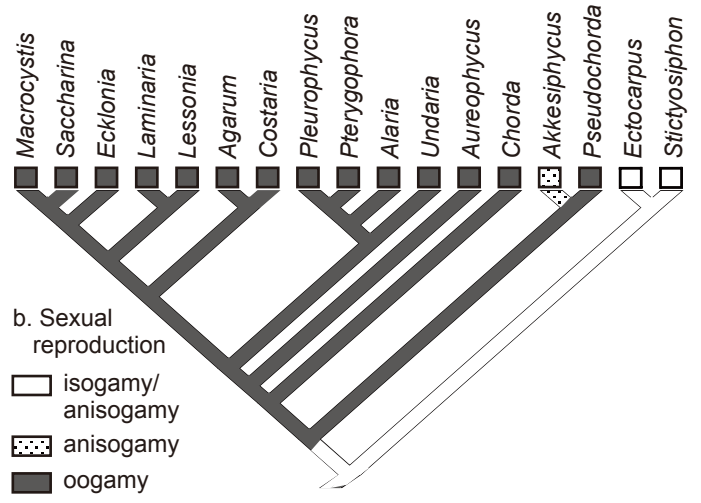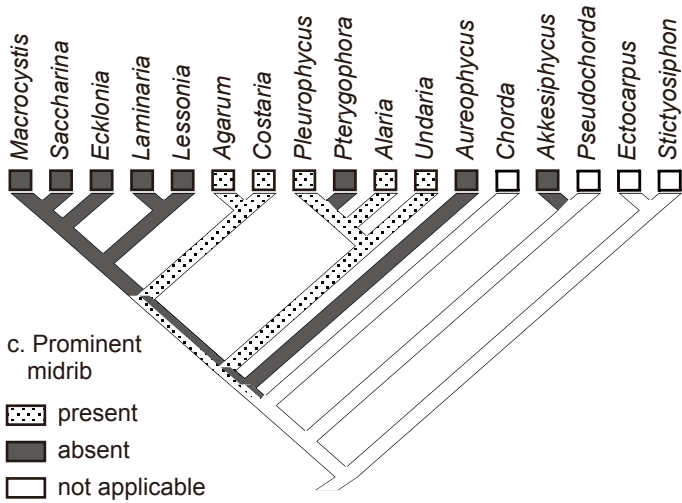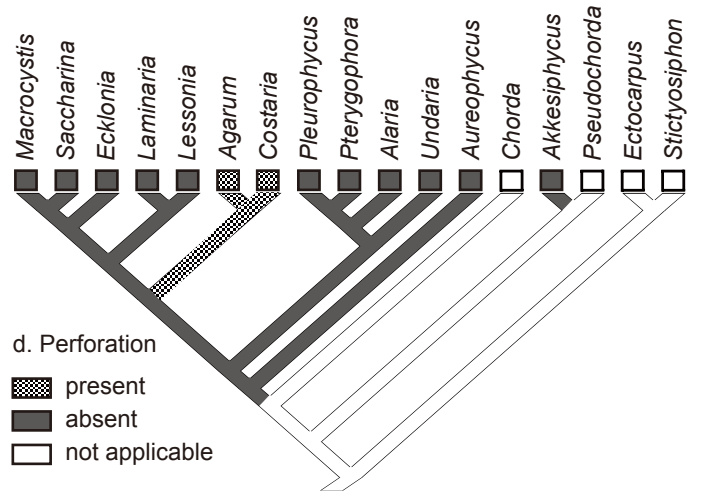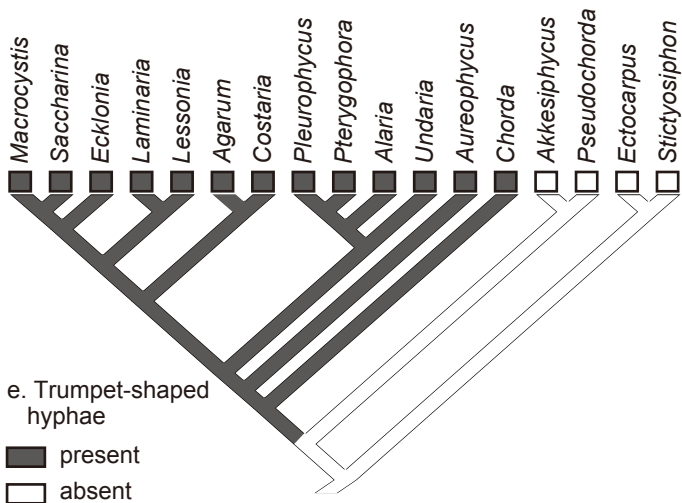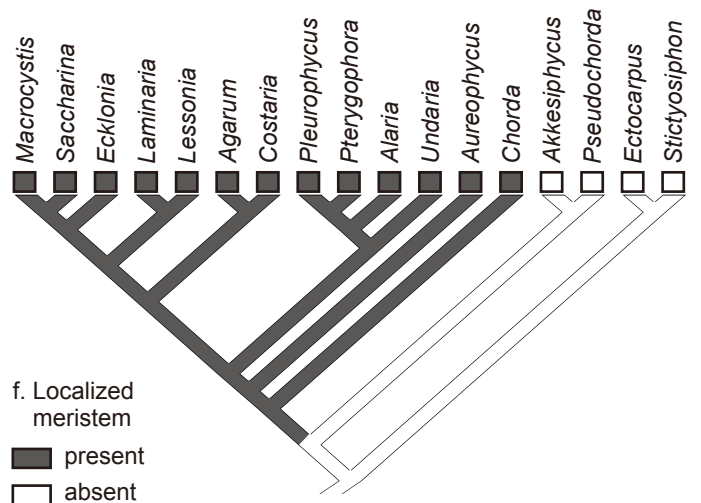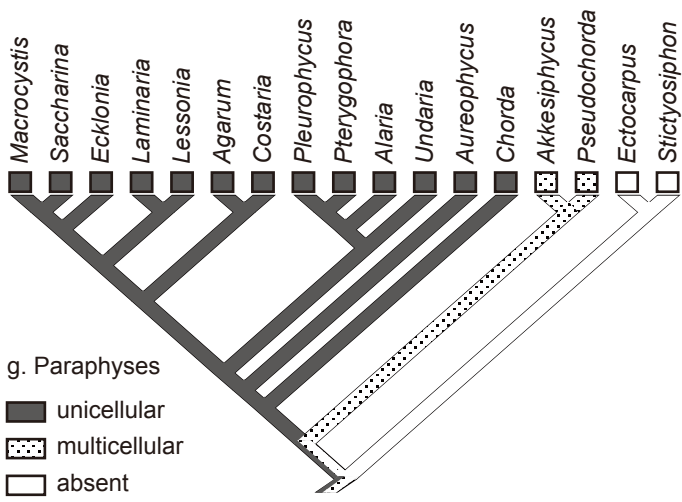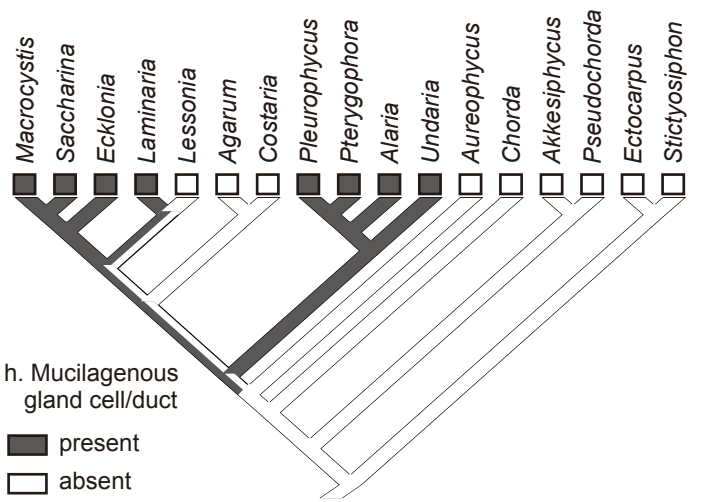



7b

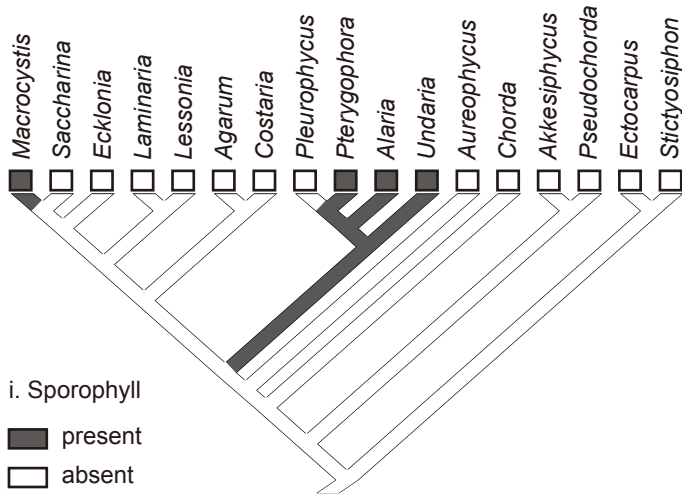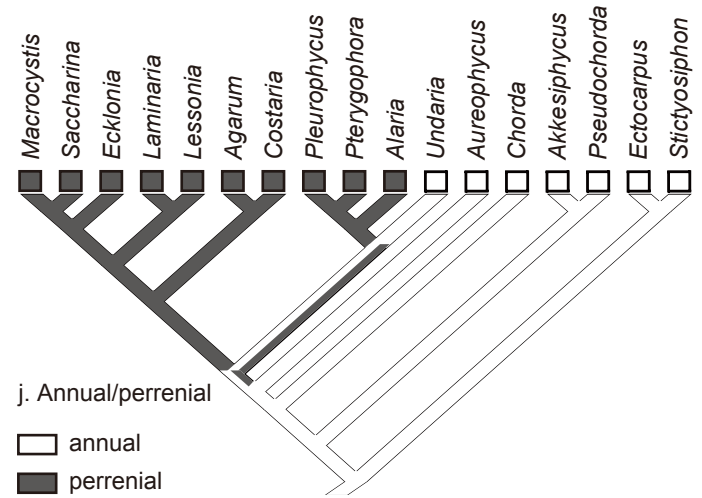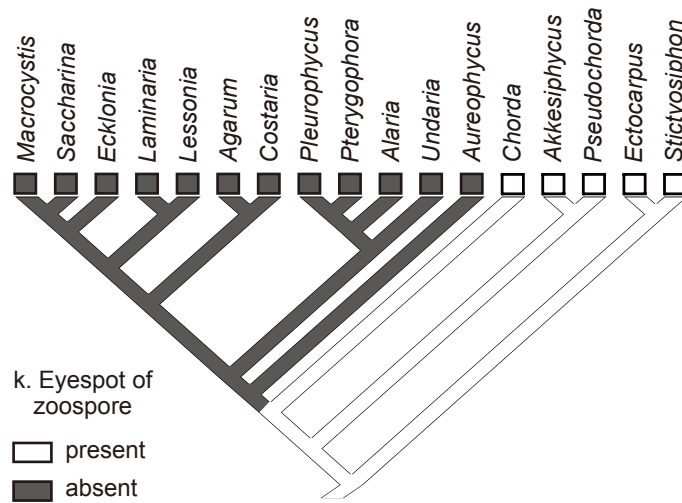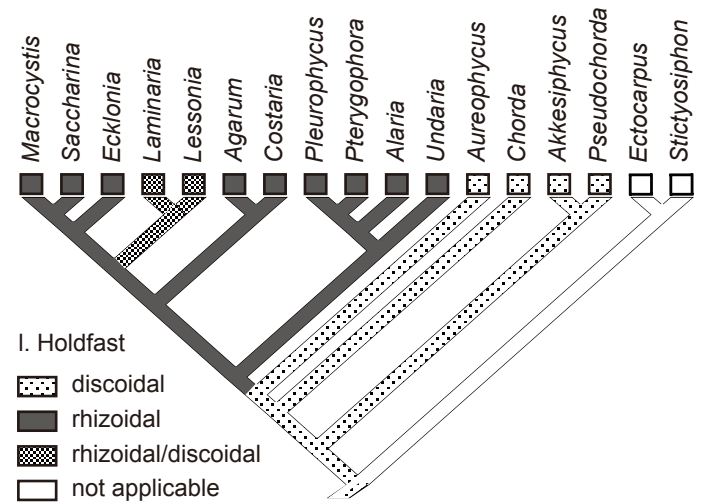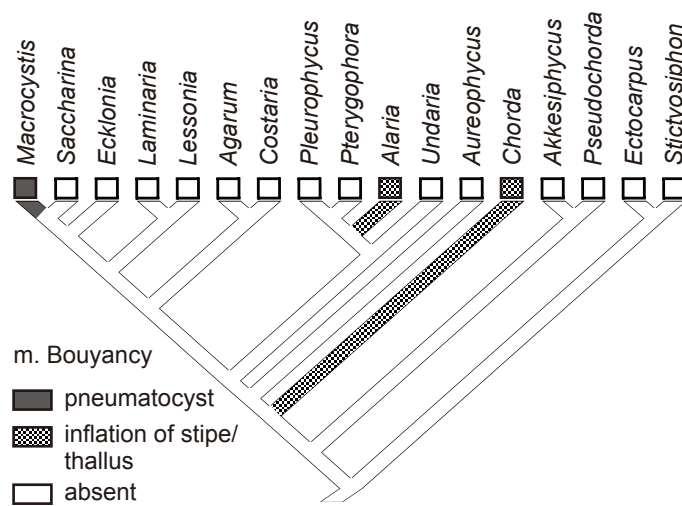

**Supplementary Information 7a,b.** a, Character mapping of representative taxonomic features of Laminariales on to the MP phylogenetic tree inferred from *rbcL*, *atpB*, *psaA*, *psaB*, *psbA*, *psbC*, *cox1* and *cox3* genes. The boxes under each terminal taxon name indicate the state known in that taxon: a, gametophyte structure; b, sexual reproduction; c, midrib; d, perforation; e, trumpet-shaped hyphae; f, localized meristem; g, paraphyses; h, mucilagenous grant cell/duct; i, sporophyll; j, annual/perennial; k, eyspot of zoospore; l, holdfast; m, bouyancy. [original drawings]

8a

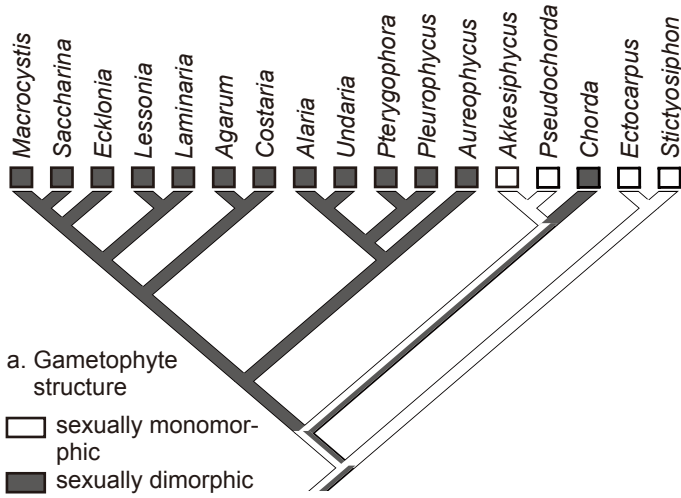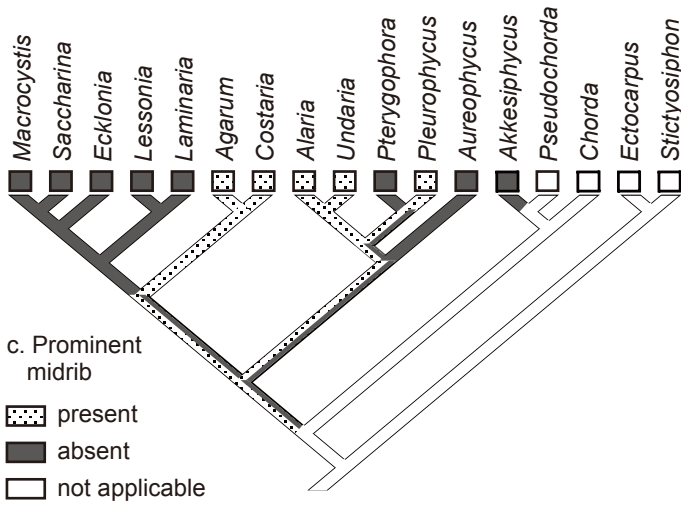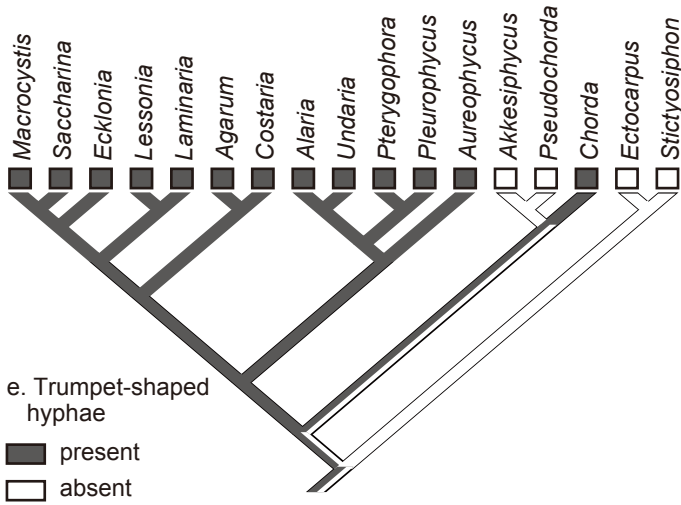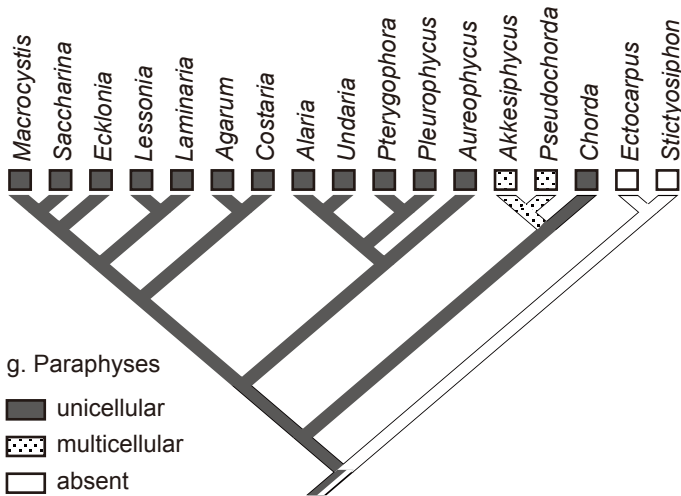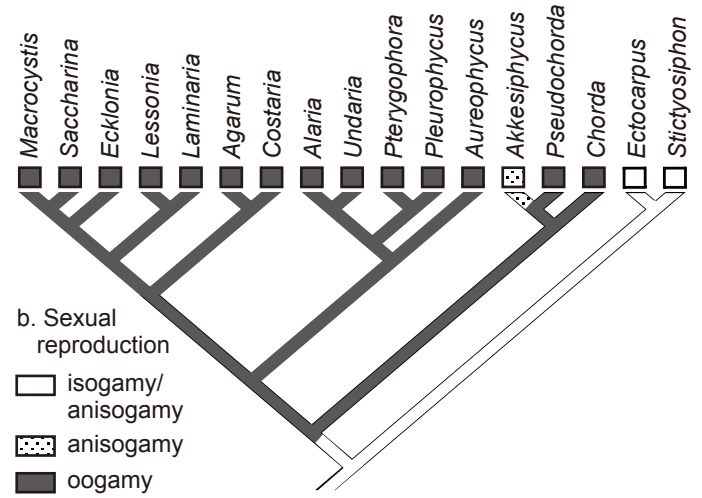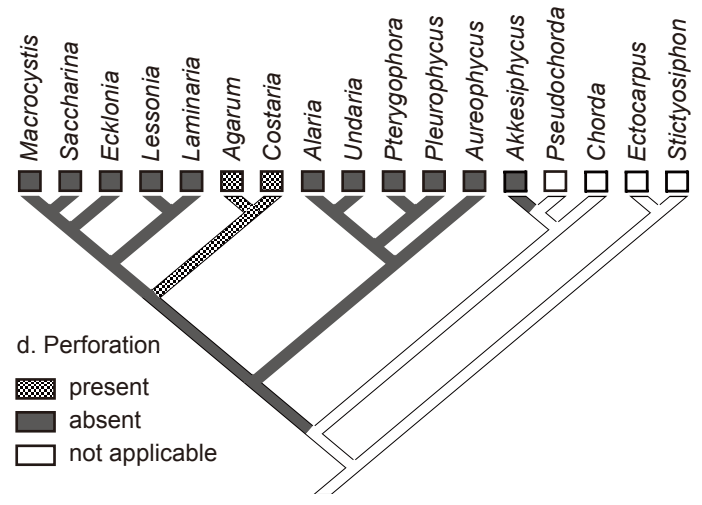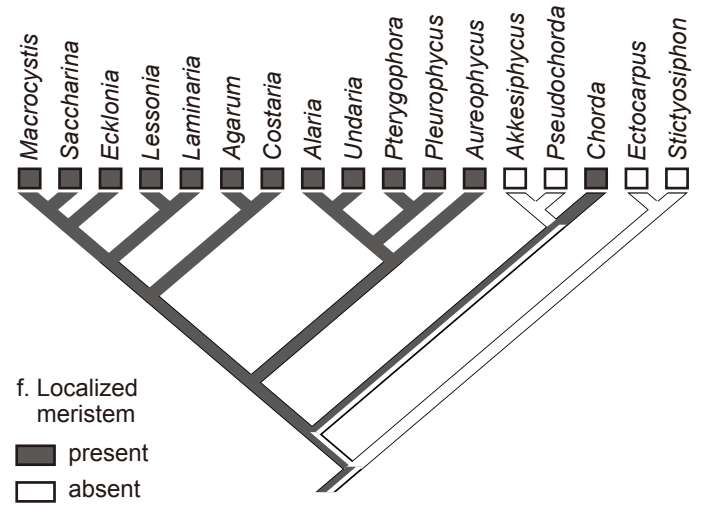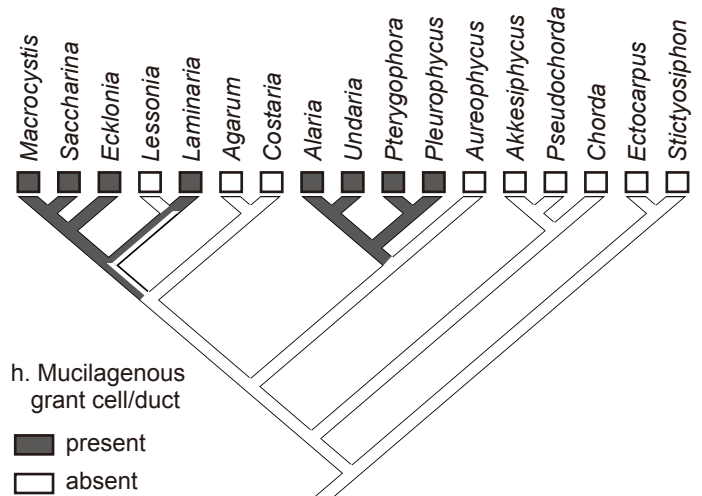



8b

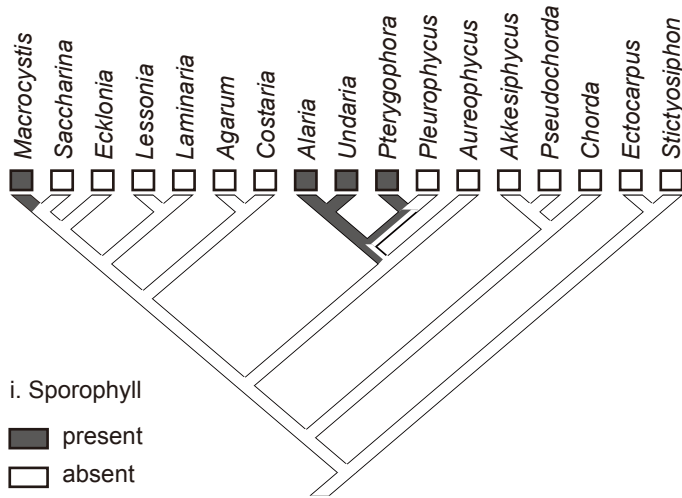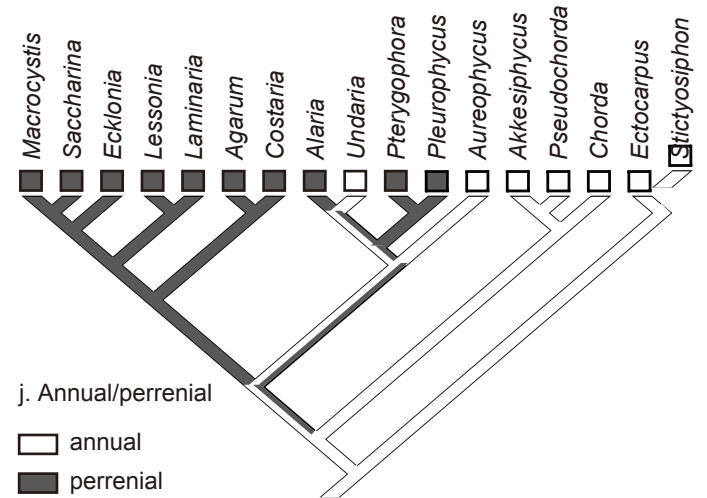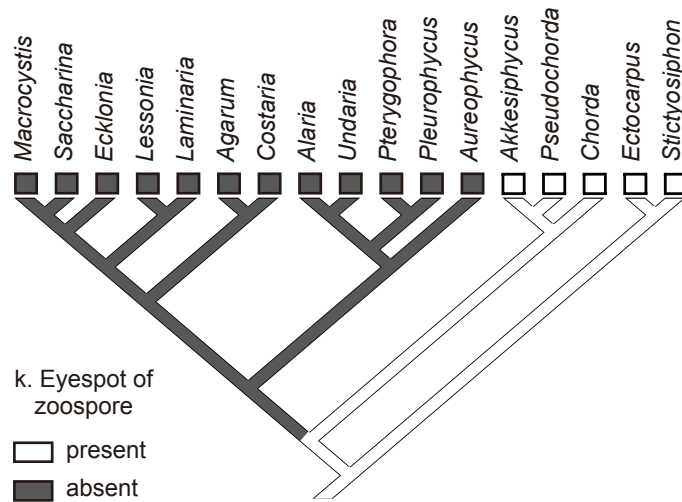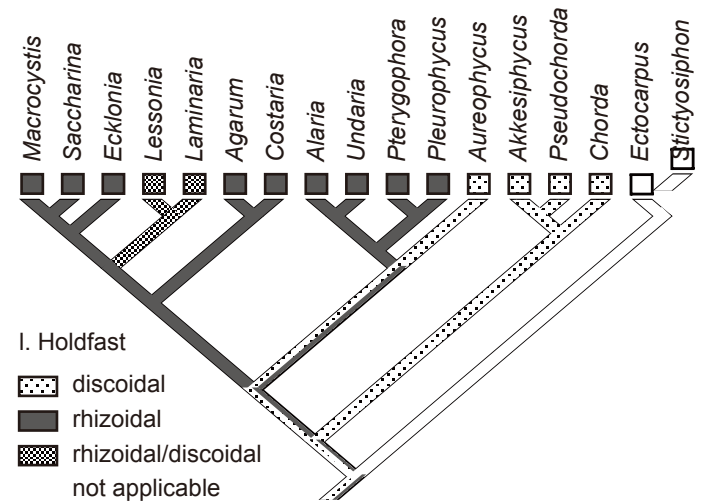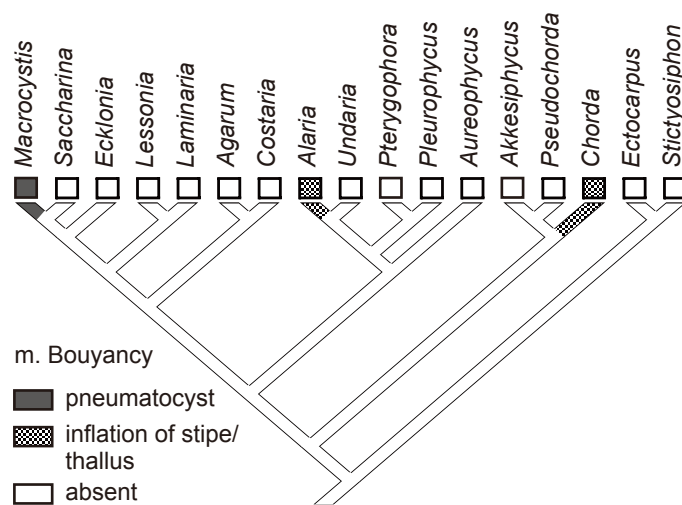

**Supplementary Information 8a,b.** a, Character mapping of representative taxonomic features of Laminariales on to one of the ML phylogenetic trees inferred from *rbcL*, *atpB*, *psaA*, *psaB*, *psbA*, *psbC*, *cox1* and *cox3* genes. The boxes under each terminal taxon name indicate the state known in that taxon: a, gametophyte structure; b, sexual reproduction; c, midrib; d, perforation; e, trumpet-shaped hyphae; f, localized meristem; g, paraphyses; h, mucilaginous grant cell/duct; i, sporophyll; j, annual/perennial; k, eyspot of zoospore; l, holdfast; m, bouyancy. [original drawings]



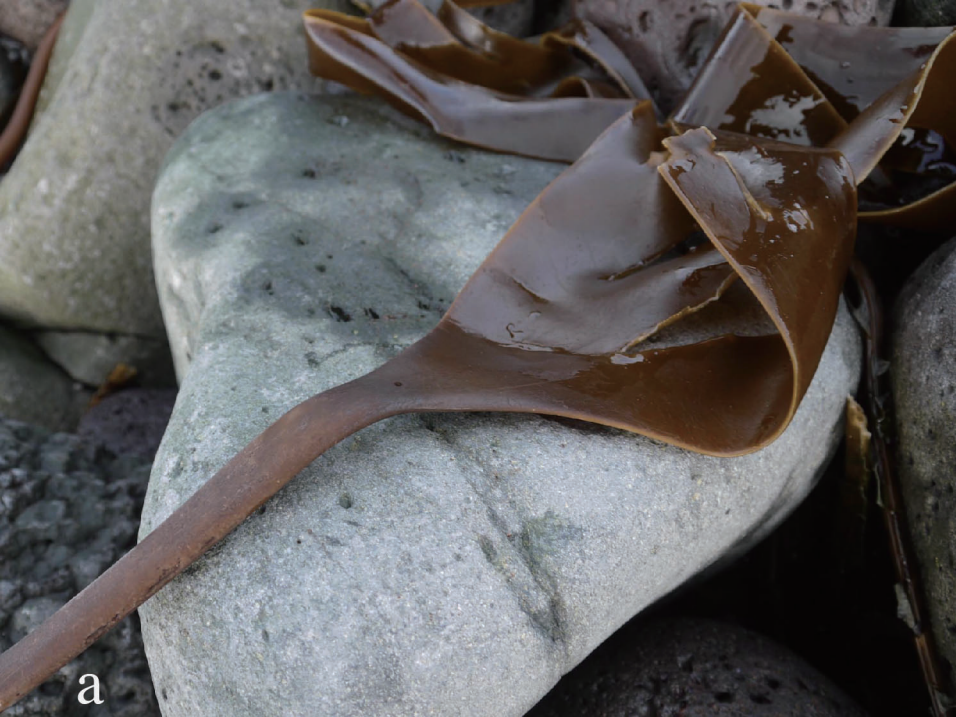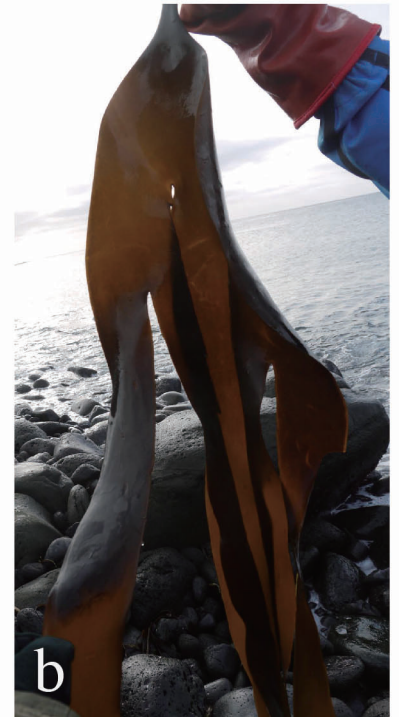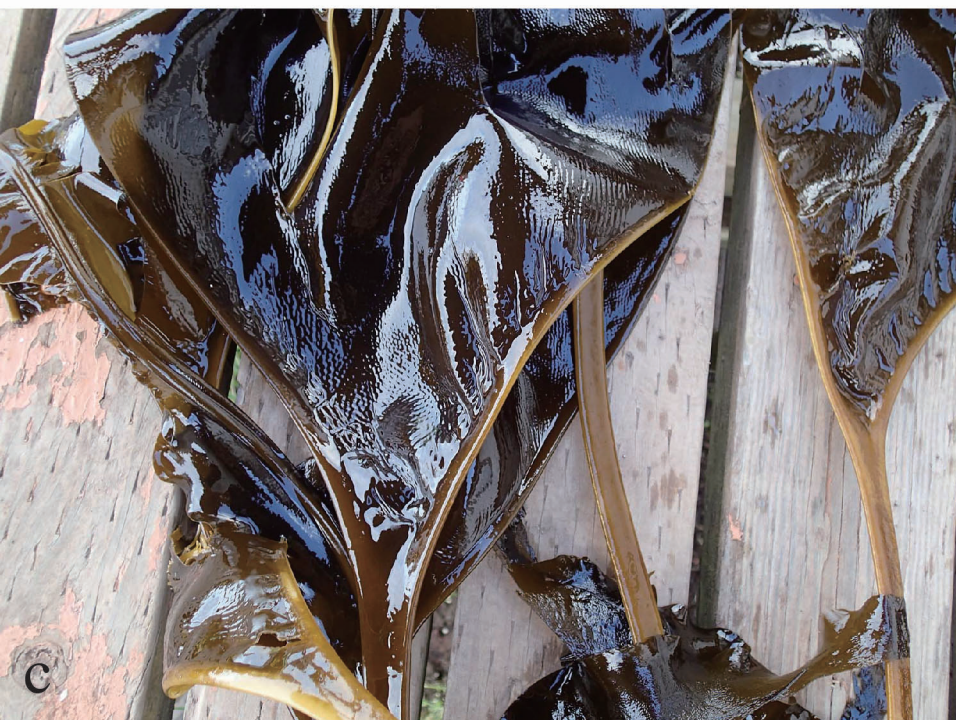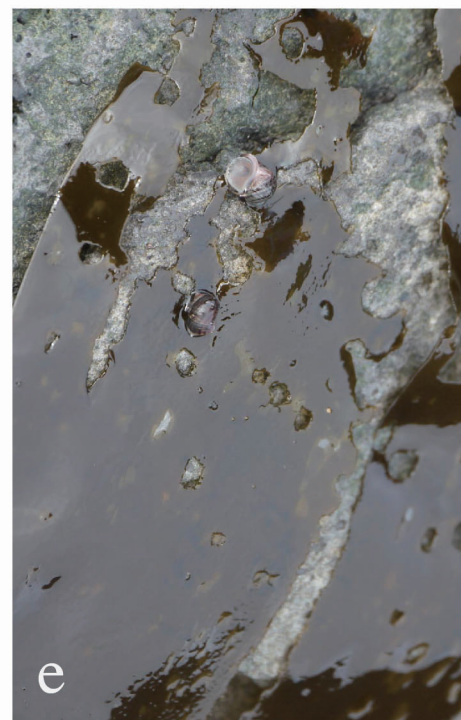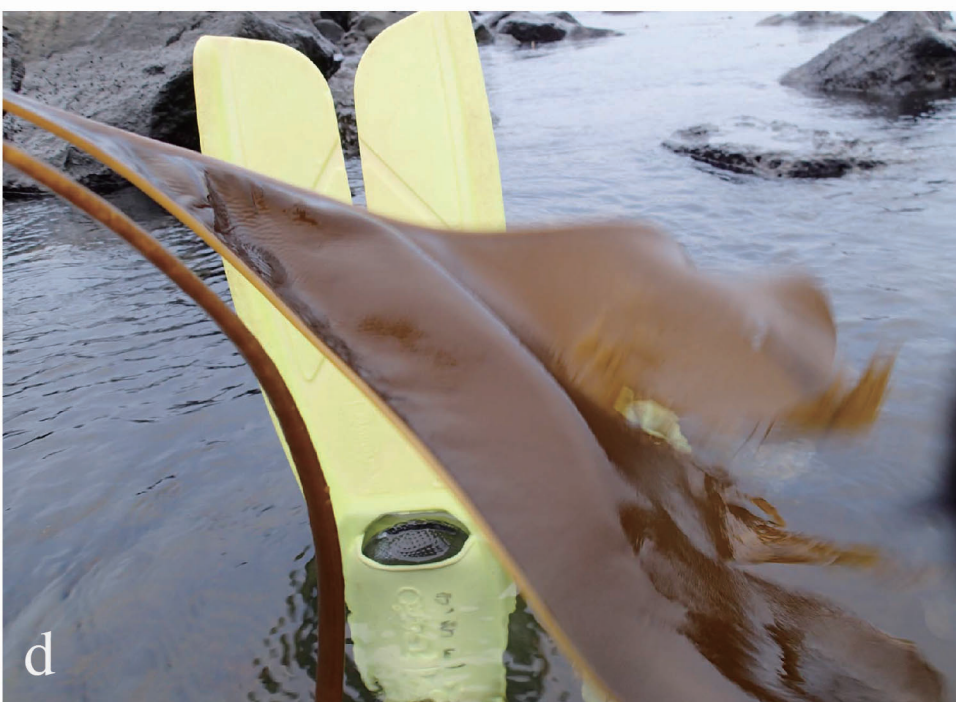

**Supplementary Information 9.**  
Comparisons of *Laminaria yezoensis* (a, b) and *Aureoophycus auleus* (c-e) at St. George Is. e shows thalli damaged by herbivores (sea snails).  
[Photographs by H.Kawai]
